# Supplementary material
Source: Springer Nature journal article supplement (https://www.springermedizin.de/resource/supplementary/12911_2013_794_MOESM3_ESM.pdf/9526654)
Supplement: MOESM3 [file 9526654]

## Option 1 : No merging of groups - 'best match'

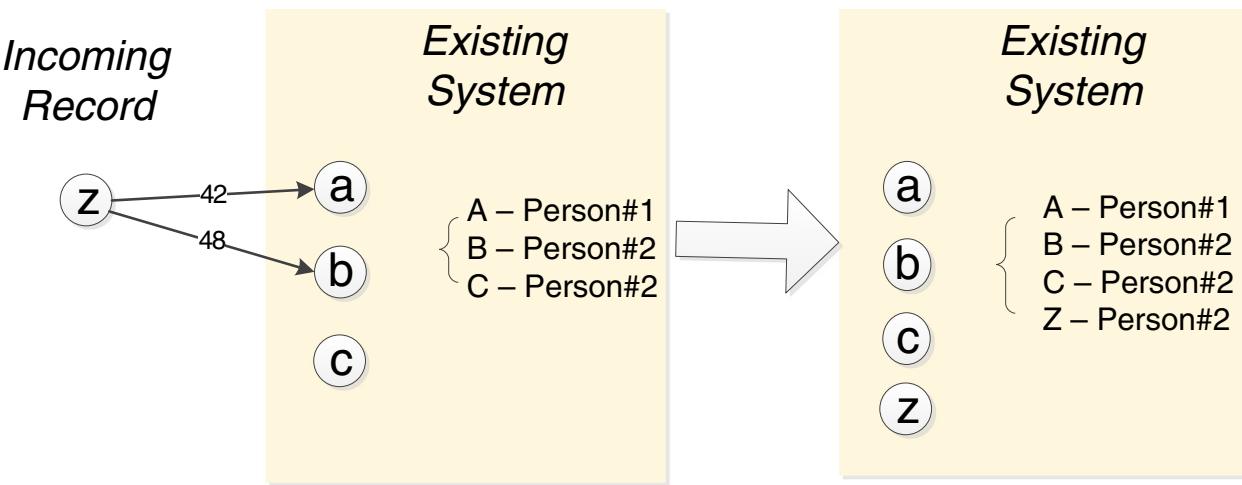

*Incoming record 'z' linked to two records, which are in separate groups. Only the 'best match' is accepted, and record 'z' joins the same group as records 'b' and 'c', with record 'a' remaining in a separate group*

## Option 2 : Merging of groups

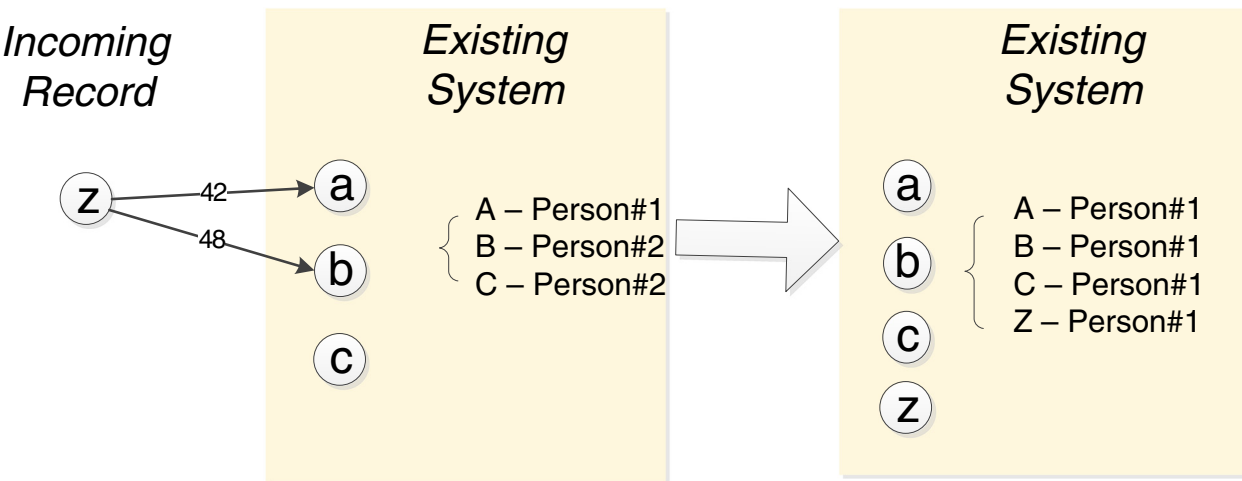

*Incoming record 'z' linked to two records, which are in separate groups. These groups are then merged, with all records now belonging to the same individual.*
